# Supplementary material
Source: PubMed Central journal article supplement (PMC5667678)

A

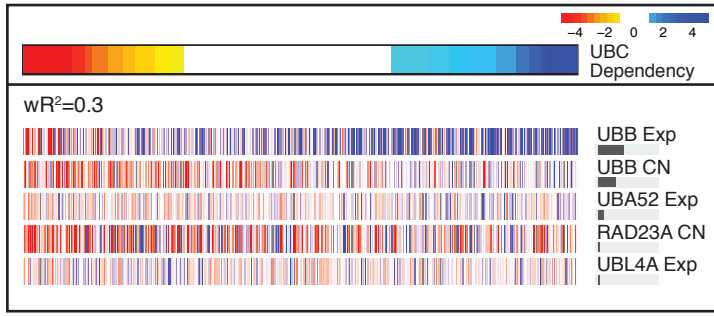

C

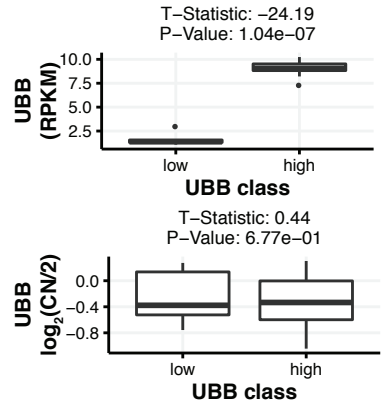

B

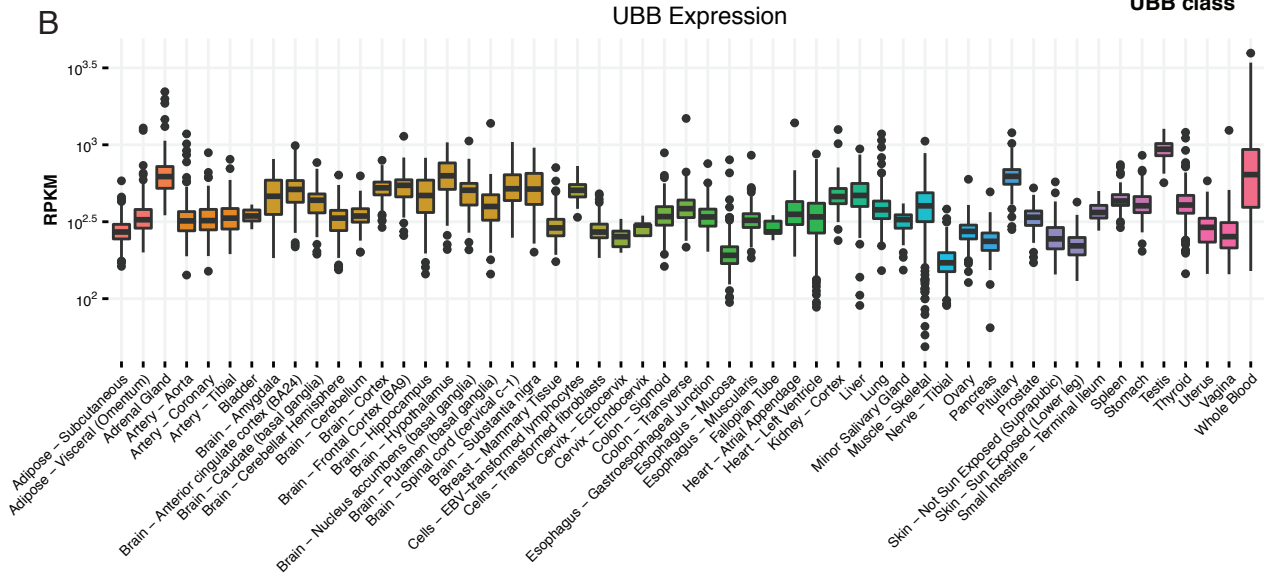

D

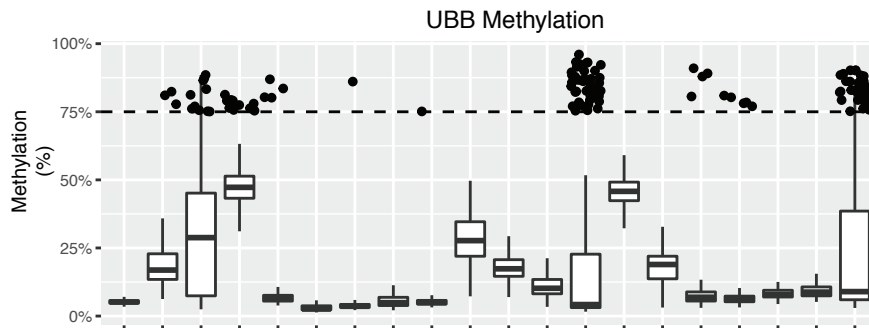

E

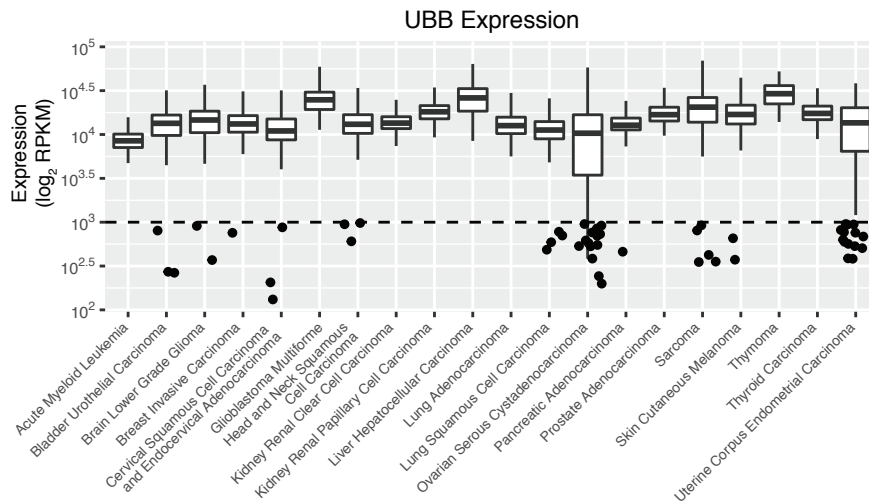

Supplement: NIHMS886779-supplement-10.pdf [file NIHMS886779-supplement-10.pdf]

A

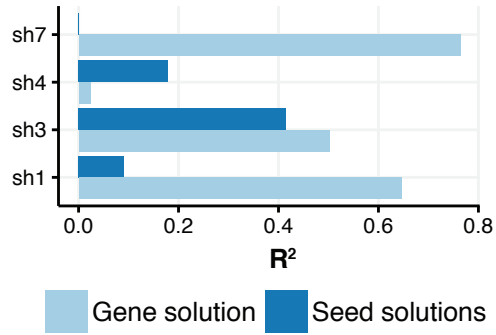

B

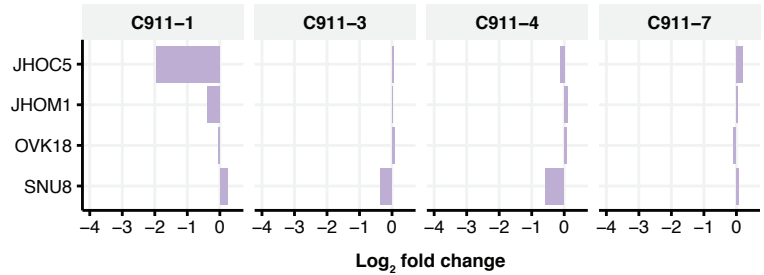

C

RT-PCR in COV434 cells

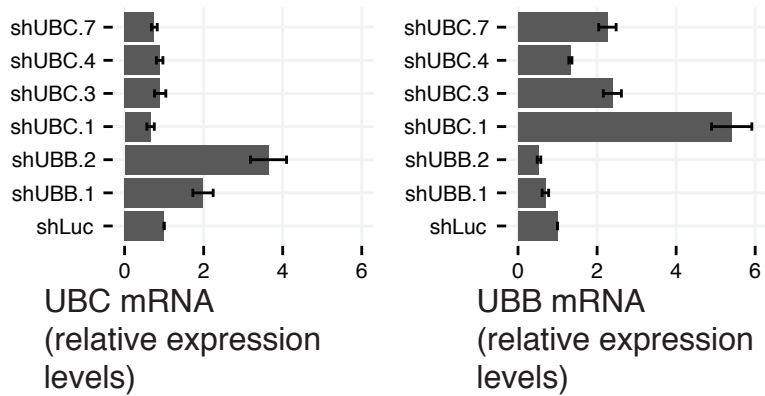

D

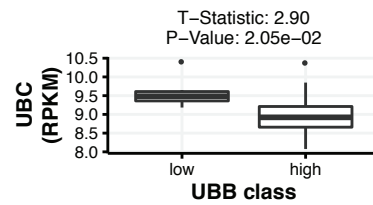

E

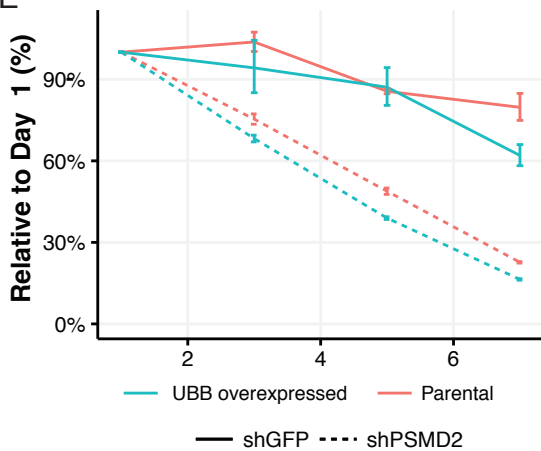

F

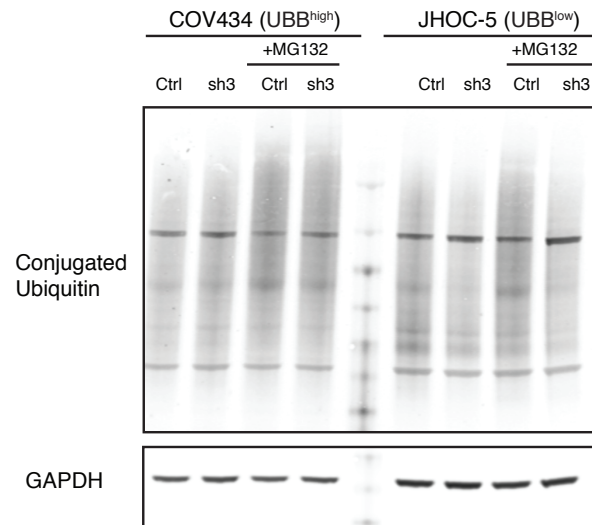

Supplement: NIHMS886779-supplement-11.pdf [file NIHMS886779-supplement-11.pdf]

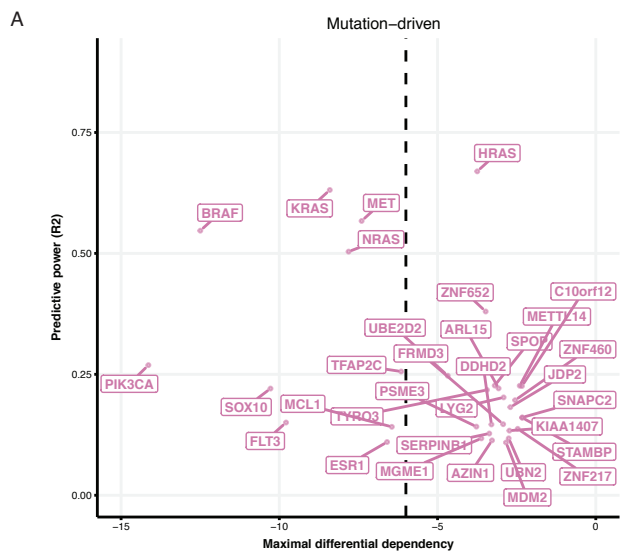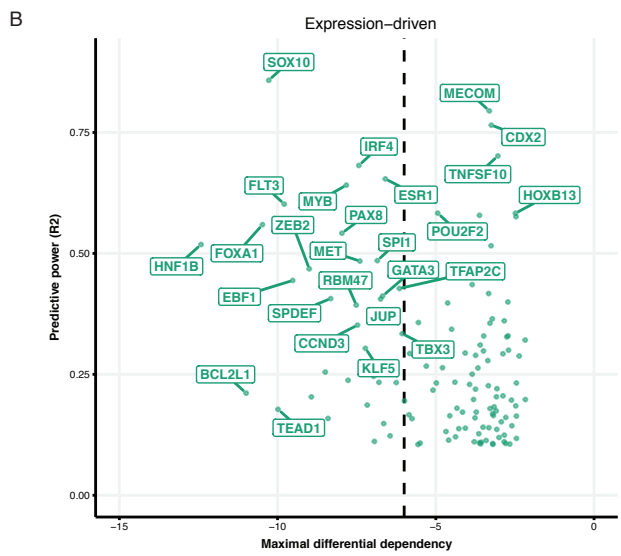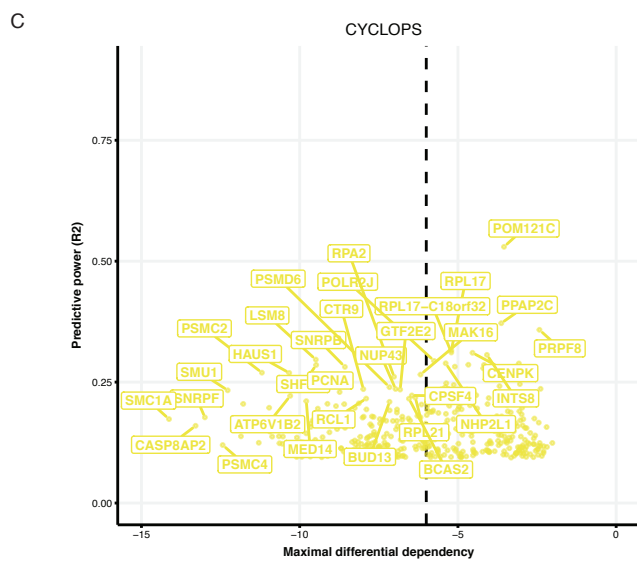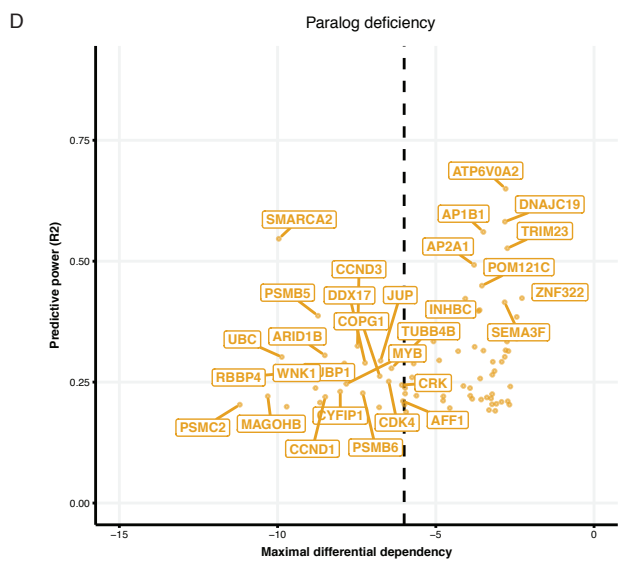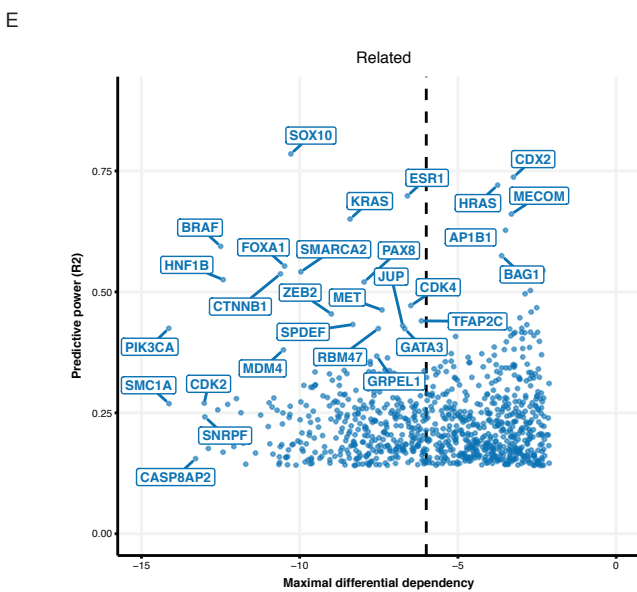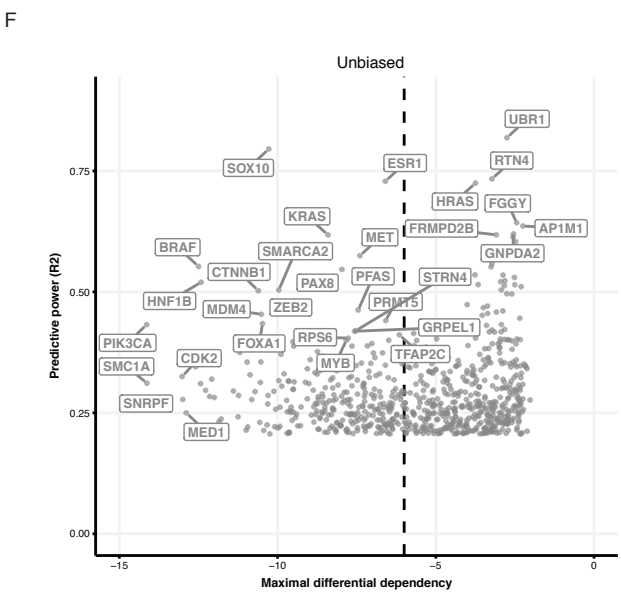

Supplement: NIHMS886779-supplement-12.pdf [file NIHMS886779-supplement-12.pdf]

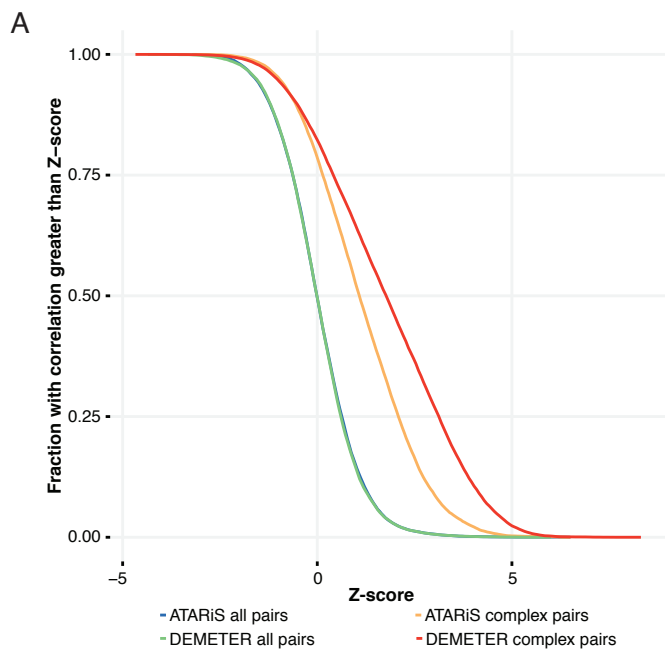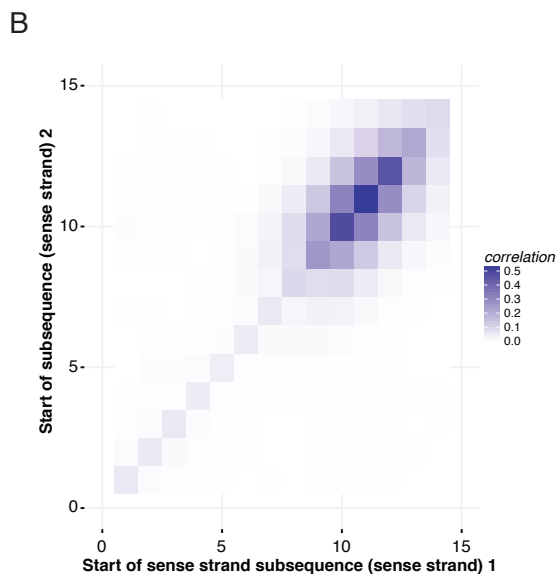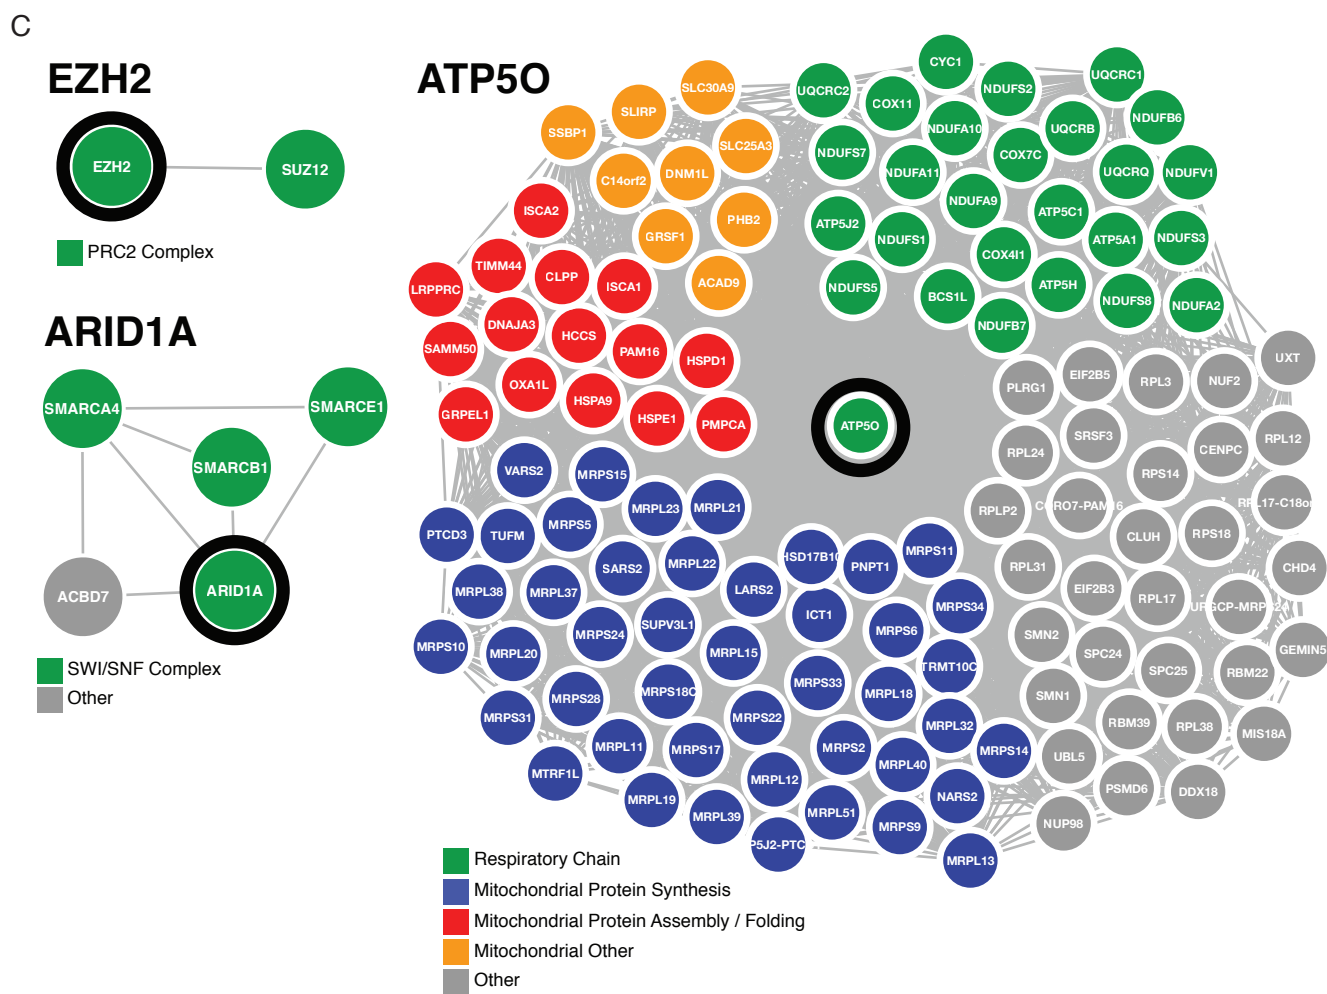

Supplement: NIHMS886779-supplement-8.pdf [file NIHMS886779-supplement-8.pdf]

A

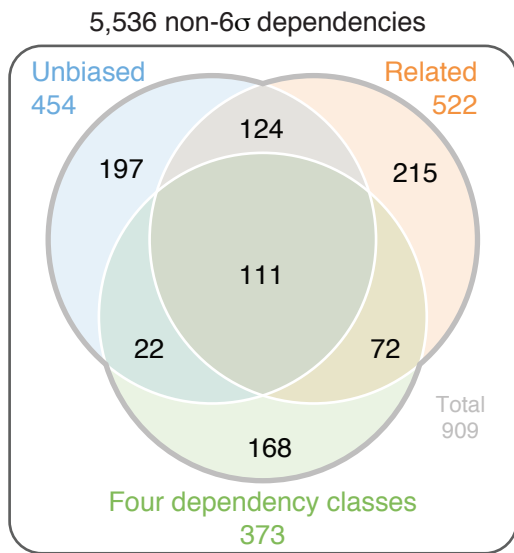

B

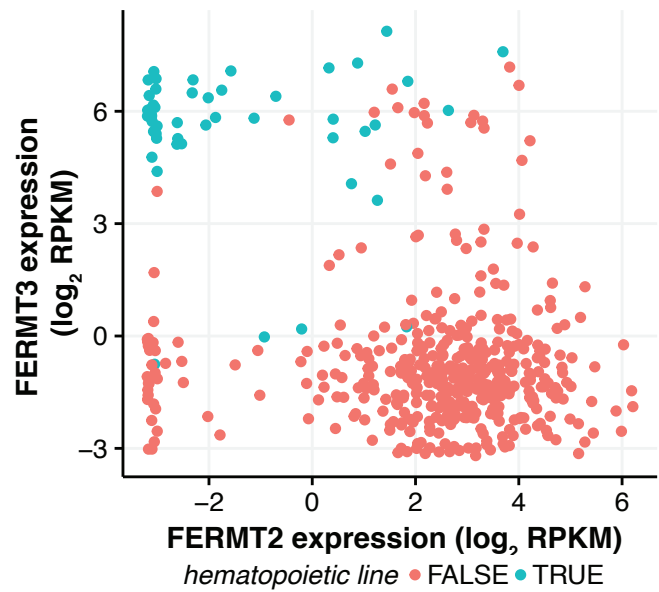

C

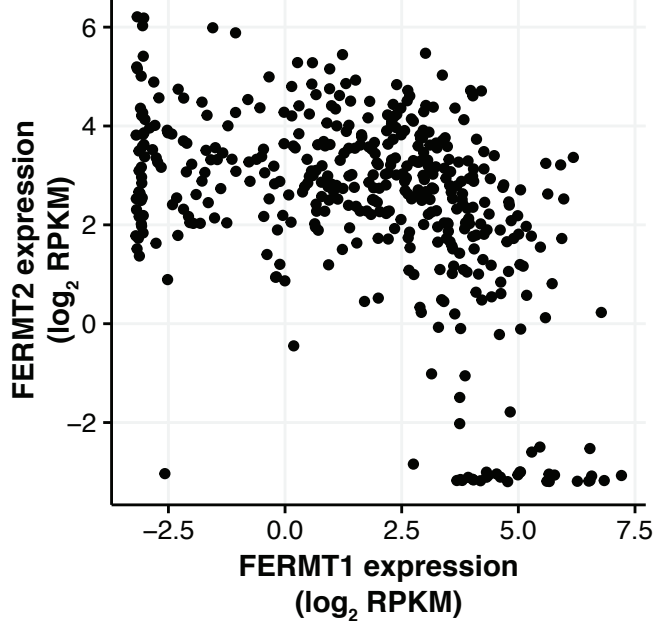

D

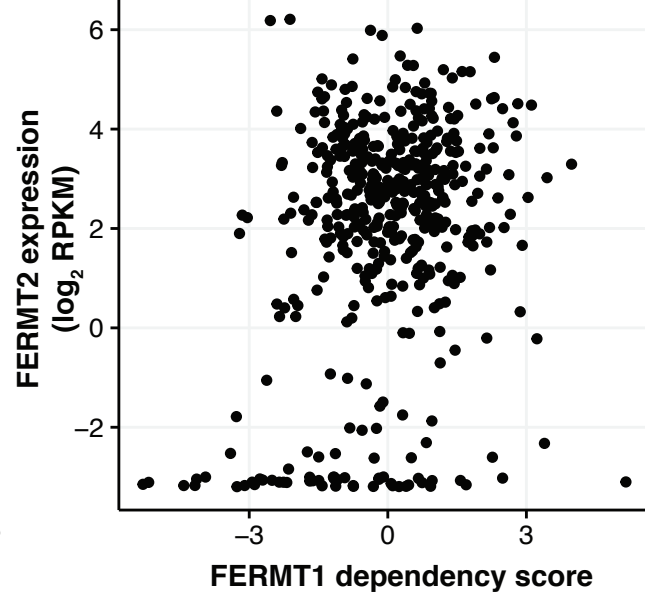

Supplement: NIHMS886779-supplement-9.pdf [file NIHMS886779-supplement-9.pdf]
